# Supplementary material for: Benchmark Dataset for Training Machine Learning Models to Predict the Pathway Involvement of Metabolites
Source: MDPI journal article supplement (doi:10.3390/metabo13111120), 2023-11-01
Supplement: s1 [file s1]

Table S1 – Parameters for configuring the atom coloring method.

| Method Parameter | Parameter Description                                           | Value We Chose | Reason For Value                                                                                                                                                   |
|------------------|-----------------------------------------------------------------|----------------|--------------------------------------------------------------------------------------------------------------------------------------------------------------------|
| r_groups         | If true, add R groups in the coloring.                          | True           | Enabled us to replace 'R' symbols with 'C' (most R-groups are bonded to the rest of the molecule beginning with a carbon) and thus include more atom color detail. |
| bond_stereo      | If true, add bond stereo detail when constructing colors.       | True           | Added stereochemistry detail to atom colors which is relevant to predicting pathway involvement and more precisely distinguishes compounds.                        |
| atom_stereo      | If true, add atom stereo detail when constructing colors.       | True           | Added stereochemistry detail to atom colors which is relevant to predicting pathway involvement and more precisely distinguishes compounds.                        |
| resonance        | If true, ignore the difference between double and single bonds. | False          | Resonance set to True treats all bonds as single bonds whereas setting it to False distinguishes bond order.                                                       |
| isotope_resolved | If true, add isotope detail when constructing colors.           | False          | Isotope specification of atoms does not uniquely identify a compound since identical compounds can contain atoms with different isotopes.                          |

|          |                                                      |       |                                                                                                                                       |
|----------|------------------------------------------------------|-------|---------------------------------------------------------------------------------------------------------------------------------------|
| charge   | If true, add charge detail when constructing colors. | False | Atom charge does not uniquely identify a compound since the only difference is electron content rather than elemental identity.       |
| backbone | If true, ignore bond types in the coloring.          | False | Added bond-type detail to atom colors which is relevant to predicting pathway involvement and more precisely distinguishes compounds. |

Figure S1 – Distribution of mean minus median differences of feature importance scores for each pathway category in the full dataset trained on the XGBoost model

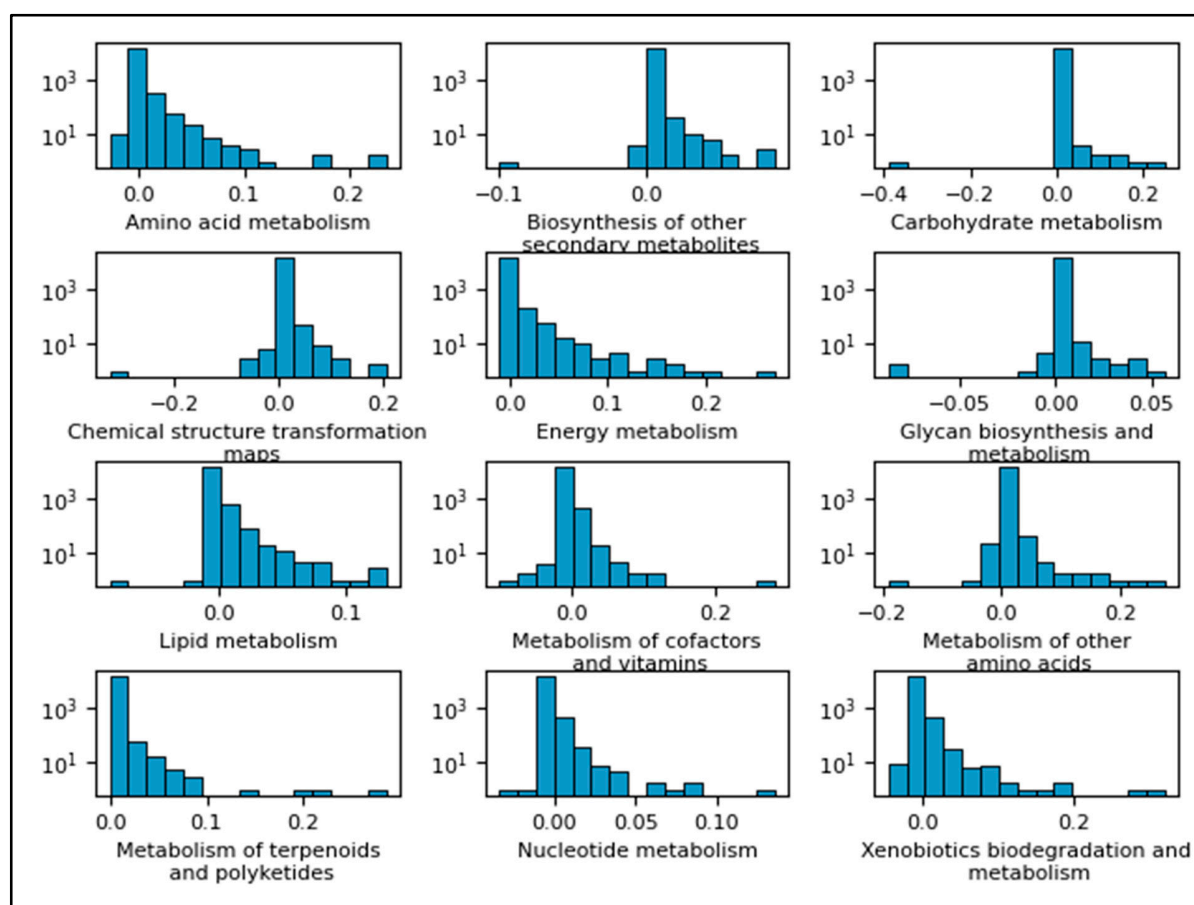

Table S4 – Pathway category proportions in each dataset.

| Dataset | Pathway category                            | Proportion |
|---------|---------------------------------------------|------------|
| Full    | Amino acid metabolism                       | 0.1075     |
|         | Biosynthesis of other secondary metabolites | 0.2615     |

|               |                                             |        |
|---------------|---------------------------------------------|--------|
|               | Carbohydrate metabolism                     | 0.0904 |
|               | Chemical structure transformation maps      | 0.0769 |
|               | Energy metabolism                           | 0.0304 |
|               | Glycan biosynthesis and metabolism          | 0.0570 |
|               | Lipid metabolism                            | 0.1191 |
|               | Metabolism of cofactors and vitamins        | 0.0966 |
|               | Metabolism of other amino acids             | 0.0482 |
|               | Metabolism of terpenoids and polyketides    | 0.1923 |
|               | Nucleotide metabolism                       | 0.0297 |
|               | Xenobiotics biodegradation and metabolism   | 0.1652 |
| Non-ambiguous | Amino acid metabolism                       | 0.1109 |
|               | Biosynthesis of other secondary metabolites | 0.2769 |
|               | Carbohydrate metabolism                     | 0.0876 |
|               | Chemical structure transformation maps      | 0.0811 |
|               | Energy metabolism                           | 0.0308 |
|               | Glycan biosynthesis and metabolism          | 0.0388 |
|               | Lipid metabolism                            | 0.1079 |
|               | Metabolism of cofactors and vitamins        | 0.0976 |
|               | Metabolism of other amino acids             | 0.0480 |
|               | Metabolism of terpenoids and polyketides    | 0.1942 |
|               | Nucleotide metabolism                       | 0.0310 |
|               | Xenobiotics biodegradation and metabolism   | 0.1752 |
| Unfiltered    | Amino acid metabolism                       | 0.1117 |
|               | Biosynthesis of other secondary metabolites | 0.2517 |
|               | Carbohydrate metabolism                     | 0.0965 |
|               | Chemical structure transformation maps      | 0.0725 |
|               | Energy metabolism                           | 0.0397 |
|               | Glycan biosynthesis and metabolism          | 0.0578 |
|               | Lipid metabolism                            | 0.1265 |
|               | Metabolism of cofactors and vitamins        | 0.1055 |
|               | Metabolism of other amino acids             | 0.0567 |
|               | Metabolism of terpenoids and polyketides    | 0.1851 |
|               | Nucleotide metabolism                       | 0.0317 |
|               | Xenobiotics biodegradation and metabolism   | 0.1695 |

Table S7 – Valid score counts less than 300.

| Model                  | Dataset | Test Set  | Pathway Category                       | Metric   | Valid Score Count |
|------------------------|---------|-----------|----------------------------------------|----------|-------------------|
| Multi-layer Perceptron | Full    | Ambiguous | Chemical structure transformation maps | Recall   | 229               |
|                        |         |           | Nucleotide metabolism                  | F1 Score | 219               |

|               |               |           |                                             |           |     |
|---------------|---------------|-----------|---------------------------------------------|-----------|-----|
|               |               |           |                                             | Recall    | 181 |
|               |               |           |                                             | Precision | 127 |
|               |               |           | Xenobiotics biodegradation and metabolism   | F1 Score  | 264 |
|               |               |           |                                             | Recall    | 215 |
|               |               |           |                                             | Precision | 99  |
| Random Forest | Full          | Ambiguous | Biosynthesis of other secondary metabolites | Precision | 159 |
|               |               |           | Chemical structure transformation maps      | Recall    | 229 |
|               |               |           | Energy metabolism                           | Precision | 69  |
|               |               |           | Metabolism of other amino acids             | Precision | 184 |
|               |               |           | Nucleotide metabolism                       | F1 Score  | 194 |
|               |               |           |                                             | Recall    | 181 |
|               |               |           |                                             | Precision | 81  |
|               |               |           | Xenobiotics biodegradation and metabolism   | F1 Score  | 270 |
|               |               |           |                                             | Recall    | 215 |
|               |               |           |                                             | Precision | 142 |
|               | Non-ambiguous | Ambiguous | Metabolism of other amino acids             | Precision | 200 |
|               |               |           | Nucleotide metabolism                       | Precision | 1   |
| XGBoost       | Full          | Ambiguous | Chemical structure transformation maps      | Recall    | 229 |
|               |               |           |                                             | Precision | 149 |
|               |               |           | Energy metabolism                           | Precision | 269 |
|               |               |           | Nucleotide metabolism                       | F1 Score  | 190 |
|               |               |           |                                             | Recall    | 181 |
|               |               |           |                                             | Precision | 182 |
|               |               |           | Xenobiotics biodegradation and metabolism   | Recall    | 215 |
|               |               |           |                                             | Precision | 240 |

Figure S2 – MCC By test set for each pathway category for the XGBoost model trained on the full dataset.

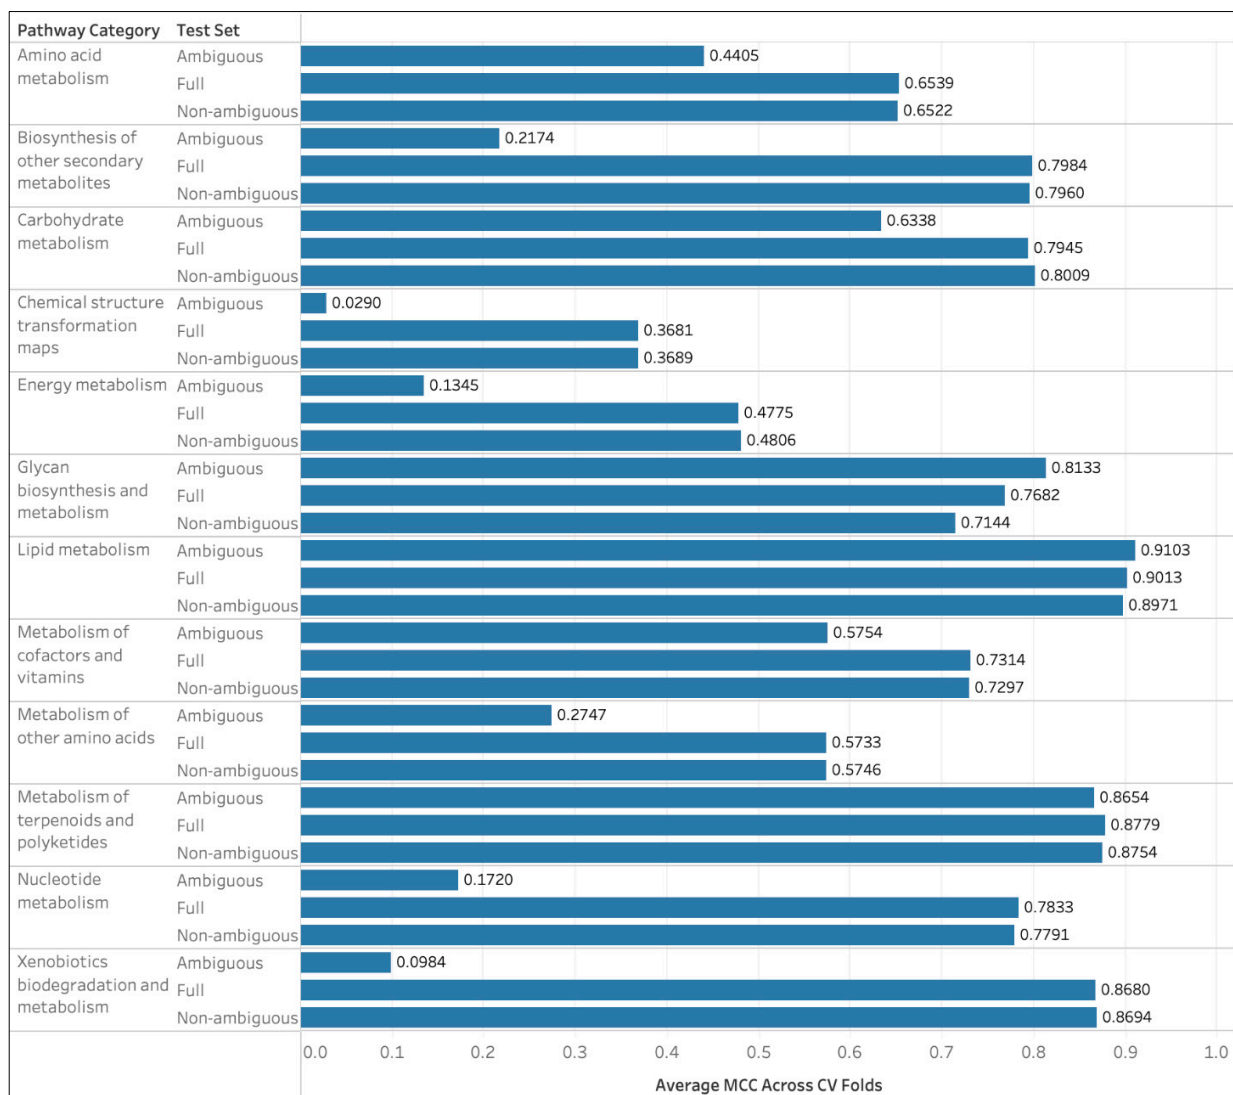

Figure S3 – Upset plot showing overlap between pathway categories of their top 50 most important features.
