# Supplementary material for: Benchmark Dataset for Training Machine Learning Models to Predict the Pathway Involvement of Metabolites
Source: Metabolites. 2023 Nov 1;13(11):1120. doi: 10.3390/metabo13111120 (PMC10673125; doi:10.3390/metabo13111120)
Supplement: Supplementary file 1 [file metabolites-13-01120-s001.zip]

Archive with 8 entries (8 files):
- AcmppSupplement_v2.4.pdf
- Figure S3 – Upset plot showing overlap between pathway categories of their top 50 most important features..png
- Table-S2_all-hyperparameters.xlsx
- Table-S3_all-scores.xlsx
- Table-S5_weighted-average.xlsx
- Table-S6_valid-score-counts_all.xlsx
- Table-S8_valid-score-counts_mcc.xlsx
- Table-S9_top-50-median-feature-importance.xlsx
